# Supplementary material
Source: PubMed Central journal article supplement (PMC3538304)

Supplementary Figure S1

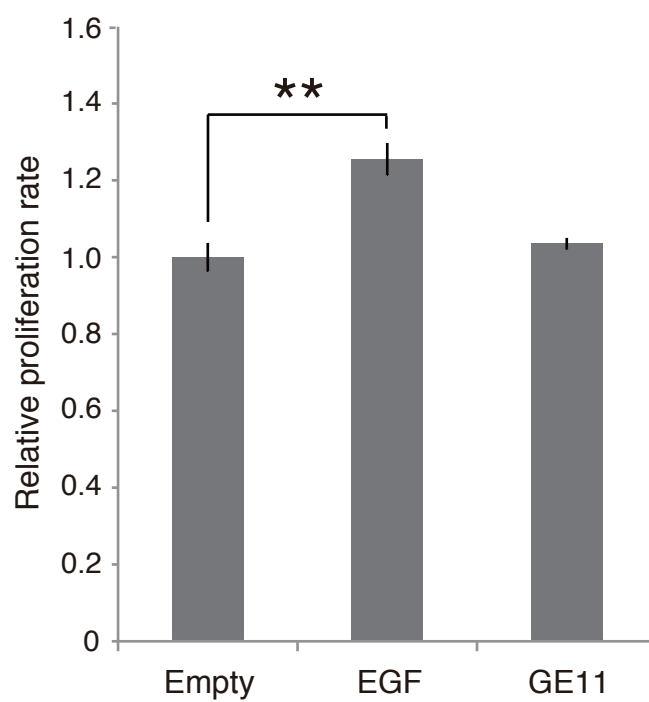

Supplement: mt2012180x1.pdf [file mt2012180x1.pdf]
